# Supplementary material for: Systematic mapping of gender equality and social inclusion in WASH interventions: knowledge clusters and gaps
Source: PubMed Central journal article supplement — BMJ Glob Health. 2023 Jan 24;8(1):e010850. doi: 10.1136/bmjgh-2022-010850 (PMC9884933; doi:10.1136/bmjgh-2022-010850), 2023-01-24

Figure S1: A draft theory of change showing review scope. The theory of change informed our meta-data coding. Source: Macura et al 2021, Campbell Systematic Reviews, <https://doi.org/10.1002/d2.1164>. Also available from: [https://miro.com/app/board/c9j\\_k57d\\_N8/](https://miro.com/app/board/c9j_k57d_N8/).

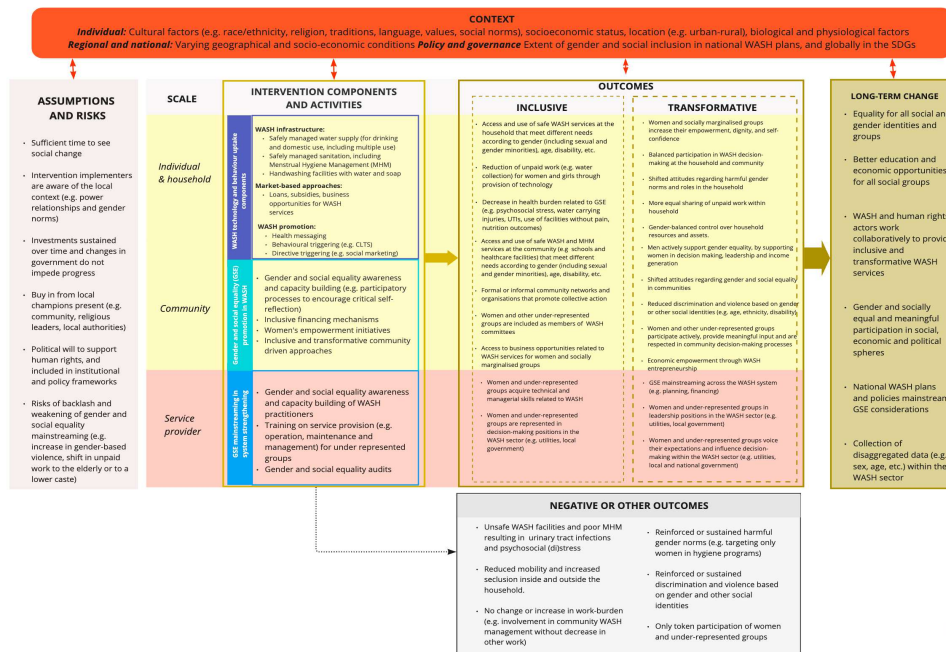

Supplement: bmjgh-2022-010850supp001.pdf [file bmjgh-2022-010850supp001.pdf]
