# Supplementary material for: Systematic mapping of gender equality and social inclusion in WASH interventions: knowledge clusters and gaps
Source: PubMed Central journal article supplement — BMJ Glob Health. 2023 Jan 24;8(1):e010850. doi: 10.1136/bmjgh-2022-010850 (PMC9884933; doi:10.1136/bmjgh-2022-010850), 2023-01-24

Figure S2: Distribution of all records across 10 classes (decile bands) representing probability of relevance from 0 to 99%, modelled with supervised machine learning (bespoke classifiers)

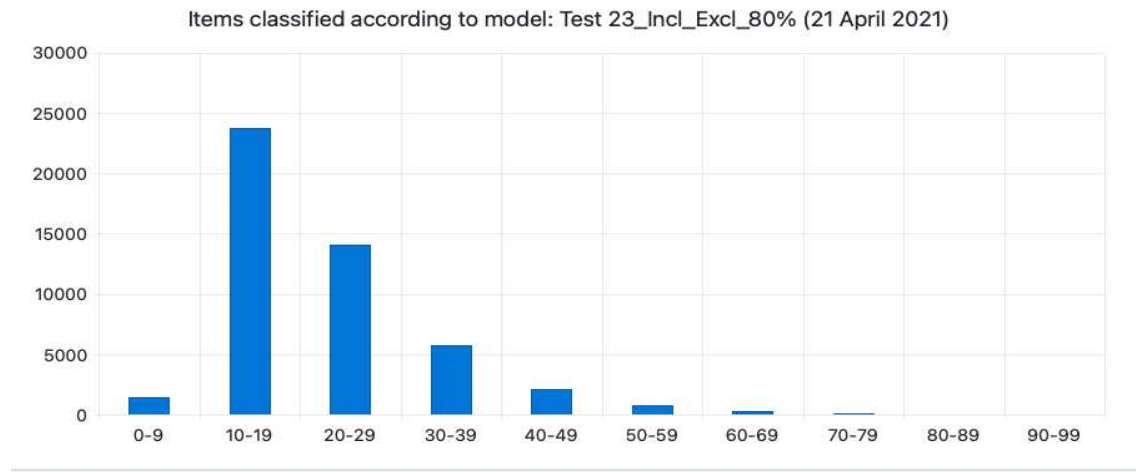

Supplement: bmjgh-2022-010850supp002.pdf [file bmjgh-2022-010850supp002.pdf]
