# Supplementary material for: Systematic mapping of gender equality and social inclusion in WASH interventions: knowledge clusters and gaps
Source: PubMed Central journal article supplement — BMJ Glob Health. 2023 Jan 24;8(1):e010850. doi: 10.1136/bmjgh-2022-010850 (PMC9884933; doi:10.1136/bmjgh-2022-010850), 2023-01-24
Supplement: bmjgh-2022-010850supp003.pdf [file bmjgh-2022-010850supp003.pdf]

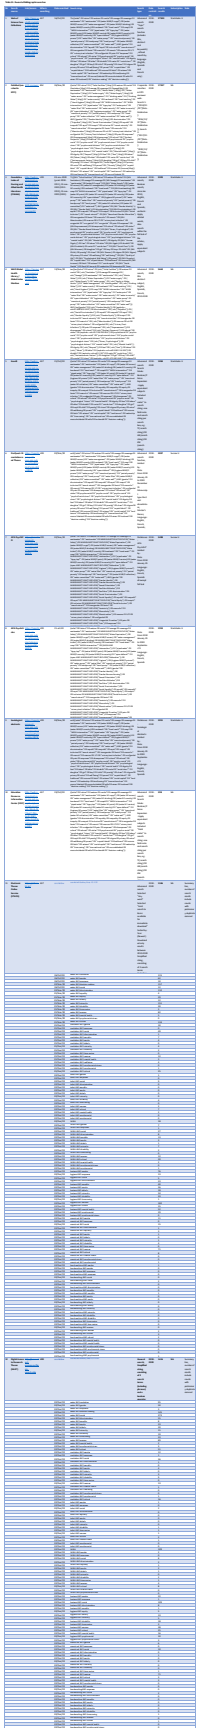

The image shows a vertical strip of a table with multiple rows and columns. The text is extremely small and difficult to read, but it appears to be a list of references or a detailed data set. The table has several columns, with the first column likely containing identifiers or titles, and subsequent columns containing various data points or dates. The overall structure is that of a standard data table or reference list.



The image shows a small, vertically oriented table with approximately 20 rows and several columns. The text within the table is extremely small and illegible, appearing as a dense grid of characters. The table is positioned on the left side of the page.
