# Supplementary material for: Systematic mapping of gender equality and social inclusion in WASH interventions: knowledge clusters and gaps
Source: PubMed Central journal article supplement — BMJ Glob Health. 2023 Jan 24;8(1):e010850. doi: 10.1136/bmjgh-2022-010850 (PMC9884933; doi:10.1136/bmjgh-2022-010850), 2023-01-24
Supplement: bmjgh-2022-010850supp005.pdf [file bmjgh-2022-010850supp005.pdf]

Table S3: Record of searches in bibliographies of relevant reviews

| Relevant review               |                                                                          | Relevant records found in reference lists of reviews       |                                      |                                                                        |                     |                                                                                                   |                                                               |                                                                                                              |                                                        |                                                                                                                   |                        |                                      |                            |                                   |
|-------------------------------|--------------------------------------------------------------------------|------------------------------------------------------------|--------------------------------------|------------------------------------------------------------------------|---------------------|---------------------------------------------------------------------------------------------------|---------------------------------------------------------------|--------------------------------------------------------------------------------------------------------------|--------------------------------------------------------|-------------------------------------------------------------------------------------------------------------------|------------------------|--------------------------------------|----------------------------|-----------------------------------|
| EppiID of the relevant review | Review short reference (author/year)                                     | Potentially relevant titles in the reference list (number) | Comment on the reference list        | Full reference of the relevant paper                                   | Year of publication | Doi                                                                                               | Item already available from other bibliographic sources ? Y/N | If already available via other bibliographic sources ? Y/N                                                   | Item previously found via grey literature search ? Y/N | Abstract inclusion based on abstract screening Y/N                                                                | Decision for exclusion | Reason for exclusion                 | Uploaded to Eppi reviewer? | Eppi ID                           |
| 52804990                      | Akanji (2017)                                                            | 0                                                          |                                      |                                                                        |                     |                                                                                                   |                                                               |                                                                                                              |                                                        |                                                                                                                   |                        |                                      |                            |                                   |
| 51699779                      | Als (2020)                                                               | 2                                                          |                                      | Gonsalves G; Husain, F., Hi                                            | 2015                | <a href="https://doi.org/10.1136/bmjgh-2020-010850">https://doi.org/10.1136/bmjgh-2020-010850</a> | Y                                                             |                                                                                                              |                                                        | Excluded                                                                                                          |                        |                                      |                            |                                   |
| 51869103                      | Andres (2018)                                                            | 0                                                          |                                      |                                                                        |                     |                                                                                                   |                                                               |                                                                                                              |                                                        |                                                                                                                   |                        |                                      |                            |                                   |
| 52126282                      | Benjamin-Chun (2017)                                                     | 0                                                          |                                      |                                                                        |                     |                                                                                                   |                                                               |                                                                                                              |                                                        |                                                                                                                   |                        |                                      |                            |                                   |
| 51710756                      | Bisung (2017)                                                            | 1                                                          |                                      | Mukhlani, T                                                            | 2014                | <a href="https://doi.org/10.5539/isd.v5n1.1">10.5539/isd.v5n1.1</a>                               | N                                                             |                                                                                                              |                                                        | N                                                                                                                 |                        | This paper is on topic/subject       |                            |                                   |
| 51702932                      | Boakye-Ansah (2016)                                                      | 1                                                          | Report                               | UN-Habitat (2016)                                                      | 2016                |                                                                                                   | N                                                             |                                                                                                              |                                                        | N                                                                                                                 |                        | The report is on topic/subject       |                            |                                   |
| 53023098                      | Borja-Vega (2018)                                                        | 0                                                          |                                      |                                                                        |                     |                                                                                                   |                                                               |                                                                                                              |                                                        |                                                                                                                   |                        |                                      |                            |                                   |
| 51708247                      | de San (2018)                                                            | 3                                                          |                                      | Ahmed, S.M. Aladuwaka, S                                               | 2016                | <a href="https://doi.org/10.2471/blt.1610247">10.2471/blt.1610247</a>                             | N                                                             |                                                                                                              |                                                        | N                                                                                                                 |                        | Objective Women's Y                  |                            |                                   |
|                               |                                                                          |                                                            | Report                               | UNDP-SIWI (2016)                                                       | 2016                | <a href="https://doi.org/10.1136/bmjgh-2016-000001">https://doi.org/10.1136/bmjgh-2016-000001</a> | Y                                                             |                                                                                                              |                                                        | Included                                                                                                          |                        |                                      | Y                          | 63565088                          |
| 51704770                      | de San (2019)                                                            | 1                                                          | Report                               | United Nations (2013)                                                  | 2013                |                                                                                                   | N                                                             |                                                                                                              |                                                        | N                                                                                                                 |                        | Y                                    | Y                          | 63565086                          |
| 51700165                      | Dery (2020)                                                              | 4                                                          |                                      | Aleixo, B., Pe Leahy, C., Wi Leder, S., Cle Stevenson, E               | 2018                | <a href="https://doi.org/10.1136/bmjgh-2018-000001">https://doi.org/10.1136/bmjgh-2018-000001</a> | Y                                                             |                                                                                                              |                                                        | Included                                                                                                          |                        |                                      |                            |                                   |
| 51709464                      | Francis (2017)                                                           | 0                                                          |                                      |                                                                        |                     |                                                                                                   |                                                               |                                                                                                              |                                                        |                                                                                                                   |                        |                                      |                            |                                   |
| 51862515                      | Groce (2011)                                                             | 0                                                          | All published before 2010            |                                                                        |                     |                                                                                                   |                                                               |                                                                                                              |                                                        |                                                                                                                   |                        |                                      |                            |                                   |
| 51718224                      | Heijnen (2014)                                                           | 0                                                          | mostly diarrhoeal outcomes           |                                                                        |                     |                                                                                                   |                                                               |                                                                                                              |                                                        |                                                                                                                   |                        |                                      |                            |                                   |
| 51713734                      | Hennegan (2011)                                                          | 3                                                          |                                      | Montgomery Wilson, E. F. Oster, Emily,                                 | 2012                | <a href="https://doi.org/10.1136/bmjgh-2012-000001">https://doi.org/10.1136/bmjgh-2012-000001</a> | Y                                                             |                                                                                                              |                                                        | Included                                                                                                          |                        | Aims and Y                           | Y                          | 63565087                          |
| 51861322                      | Jasper (2012)                                                            | 0                                                          |                                      |                                                                        |                     |                                                                                                   |                                                               |                                                                                                              |                                                        |                                                                                                                   |                        |                                      |                            |                                   |
| 51719272                      | Kevany (2013)                                                            | 2                                                          |                                      | Aladuwaka, S Karim, K.M.R                                              | 2010                | <a href="https://doi.org/10.1136/bmjgh-2010-000001">https://doi.org/10.1136/bmjgh-2010-000001</a> | Y                                                             |                                                                                                              |                                                        | Included                                                                                                          |                        |                                      |                            |                                   |
| 51709947                      | Kuhlmann (2011)                                                          | 3                                                          |                                      | Haque SE, Ra Montgomery Sommer, Ma                                     | 2014                | <a href="https://doi.org/10.1136/bmjgh-2014-000001">10.1136/bmjgh-2014-000001</a>                 | N                                                             |                                                                                                              |                                                        | N                                                                                                                 |                        | Objective Y                          |                            | duplicate removed from Eppi       |
|                               |                                                                          |                                                            |                                      | Montgomery Sommer, Ma                                                  | 2010                | <a href="https://doi.org/10.3362/1755-2638-100001">10.3362/1755-2638-100001</a>                   | N                                                             |                                                                                                              |                                                        | Included                                                                                                          |                        | The water on study type              |                            |                                   |
| 51711899                      | Majuru (2016)                                                            | 1                                                          |                                      | Fogelberg, K                                                           | 2010                | <a href="https://doi.org/10.3362/1755-2638-100001">10.3362/1755-2638-100001</a>                   | N                                                             |                                                                                                              |                                                        | N                                                                                                                 |                        | While pri Y                          | Y                          | 63536231                          |
| 51864184                      | Mathai (2010)                                                            | 0                                                          | All published before 2010            |                                                                        |                     |                                                                                                   |                                                               |                                                                                                              |                                                        |                                                                                                                   |                        |                                      |                            |                                   |
| 51698901                      | Mbakaya (2020)                                                           | 4                                                          | Thesis                               | Cantrell BL, Contzen N, Musoke D, Mwakitima                            | 2013                |                                                                                                   | N                                                             |                                                                                                              |                                                        | N                                                                                                                 |                        | Backgrou Y                           | Y                          | 63536232                          |
|                               |                                                                          |                                                            |                                      | Contzen N, Musoke D, Mwakitima                                         | 2015                | <a href="https://doi.org/10.1016/j.sc.2015.04.001">10.1016/j.sc.2015.04.001</a>                   | Y                                                             |                                                                                                              |                                                        | Included                                                                                                          |                        |                                      |                            |                                   |
|                               |                                                                          |                                                            |                                      | Mwakitima                                                              | 2018                | <a href="https://doi.org/10.1136/bmjgh-2018-000001">https://doi.org/10.1136/bmjgh-2018-000001</a> | Y                                                             |                                                                                                              |                                                        | Included                                                                                                          |                        |                                      |                            |                                   |
| 51704165                      | McMichael (2019)                                                         | 1                                                          |                                      | Montgomery                                                             | 2012                | <a href="https://doi.org/10.1136/bmjgh-2012-000001">https://doi.org/10.1136/bmjgh-2012-000001</a> | Y                                                             |                                                                                                              |                                                        | Included                                                                                                          |                        |                                      |                            |                                   |
| 51704072                      | Saleem (2019)                                                            | 2                                                          |                                      | Corburn J, Hill Janmohamed                                             | 2015                | <a href="https://doi.org/10.1155/2015/104269">10.1155/2015/104269</a>                             | Y                                                             |                                                                                                              |                                                        | Excluded                                                                                                          |                        |                                      |                            |                                   |
| 51705550                      | Sclar (2018)                                                             | 3                                                          |                                      | O'Reilly, K., Pfadenhauer, Prabhakaran,                                | 2016                | <a href="https://doi.org/10.3362/1755-2638-100001">https://doi.org/10.3362/1755-2638-100001</a>   | Y                                                             |                                                                                                              |                                                        | Included                                                                                                          |                        | Inadequa N                           |                            | on outcome                        |
|                               |                                                                          |                                                            |                                      | Pfadenhauer, Prabhakaran,                                              | 2016                | <a href="https://open.aphis.gov/handle/10111/53362">https://open.aphis.gov/handle/10111/53362</a> | N                                                             |                                                                                                              |                                                        | N                                                                                                                 |                        | This Evid Y                          | Y                          | 63536233                          |
| 51861706                      | Soon (2012)                                                              | 0                                                          | Food hygiene                         |                                                                        |                     |                                                                                                   |                                                               |                                                                                                              |                                                        |                                                                                                                   |                        |                                      |                            |                                   |
| 51703161                      | Tamiztousi (2011)                                                        | 0                                                          | mostly systematic reviews referenced |                                                                        |                     |                                                                                                   |                                                               |                                                                                                              |                                                        |                                                                                                                   |                        |                                      |                            |                                   |
| 51711887                      | Taukobong (2011)                                                         | 0                                                          | lack WASH                            |                                                                        |                     |                                                                                                   |                                                               |                                                                                                              |                                                        |                                                                                                                   |                        |                                      |                            |                                   |
| 51713754                      | Uddin (2016)                                                             | 0                                                          |                                      |                                                                        |                     |                                                                                                   |                                                               |                                                                                                              |                                                        |                                                                                                                   |                        |                                      |                            |                                   |
| 51699762                      | Wali (2020)                                                              | 2                                                          |                                      | Leahy, C., Wi Leder, S., Cle                                           | 2017                | <a href="https://doi.org/10.1136/bmjgh-2017-000001">https://doi.org/10.1136/bmjgh-2017-000001</a> | Y                                                             |                                                                                                              |                                                        | Included                                                                                                          |                        |                                      |                            |                                   |
| 51859884                      | West (2013)                                                              | 0                                                          | mostly published before 2010         |                                                                        |                     |                                                                                                   |                                                               |                                                                                                              |                                                        |                                                                                                                   |                        |                                      |                            |                                   |
| 51863682                      | Wilson (2011)                                                            | 0                                                          | mostly published before 2010         |                                                                        |                     |                                                                                                   |                                                               |                                                                                                              |                                                        |                                                                                                                   |                        |                                      |                            |                                   |
| 51715991                      | Yates (2015)                                                             | 1                                                          |                                      | Loharikar A, I                                                         | 2013                | <a href="https://doi.org/10.4269/ajtmh.130101">10.4269/ajtmh.130101</a>                           | N                                                             |                                                                                                              |                                                        | N                                                                                                                 |                        | A clinic-b Y                         |                            | duplicate removed from Eppi       |
| 52122752                      | Abrahams (2011)                                                          | 0                                                          | mostly published before 2010         |                                                                        |                     |                                                                                                   |                                                               |                                                                                                              |                                                        |                                                                                                                   |                        |                                      |                            |                                   |
| 51698735                      | Adams (2020)                                                             | 0                                                          |                                      |                                                                        |                     |                                                                                                   |                                                               |                                                                                                              |                                                        |                                                                                                                   |                        |                                      |                            |                                   |
| 51705295                      | Allen (2018)                                                             | 0                                                          |                                      |                                                                        |                     |                                                                                                   |                                                               |                                                                                                              |                                                        |                                                                                                                   |                        |                                      |                            |                                   |
| 51716047                      | Banana (2015)                                                            | 1                                                          |                                      | McGranahan                                                             | 2013                |                                                                                                   | N                                                             |                                                                                                              |                                                        | N                                                                                                                 |                        | There is N                           |                            | on topic/subject                  |
| 52121312                      | Belliappa (2018)                                                         | 0                                                          |                                      |                                                                        |                     |                                                                                                   |                                                               |                                                                                                              |                                                        |                                                                                                                   |                        |                                      |                            |                                   |
| 51861628                      | Garg (2012)                                                              | 0                                                          |                                      |                                                                        |                     |                                                                                                   |                                                               |                                                                                                              |                                                        |                                                                                                                   |                        |                                      |                            |                                   |
| 52130135                      | Joubert (2014)                                                           | 0                                                          |                                      |                                                                        |                     |                                                                                                   |                                                               |                                                                                                              |                                                        |                                                                                                                   |                        |                                      |                            |                                   |
| 51719278                      | Neilson (2013)                                                           | 0                                                          |                                      |                                                                        |                     |                                                                                                   |                                                               |                                                                                                              |                                                        |                                                                                                                   |                        |                                      |                            |                                   |
| 51714473                      | O'Reilly (2016)                                                          | 2                                                          |                                      | Sommer, Ma O'Reilly K. Cc                                              | 2010                | <a href="https://doi.org/10.3362/1755-2638-100001">10.3362/1755-2638-100001</a>                   | N                                                             |                                                                                                              |                                                        | N                                                                                                                 |                        | The water REPEAT (row 32)            |                            |                                   |
|                               |                                                                          |                                                            |                                      | Sommer, Ma O'Reilly K. Cc                                              | 2010                | <a href="https://www.aphis.gov/handle/10111/53362">https://www.aphis.gov/handle/10111/53362</a>   | N                                                             |                                                                                                              |                                                        | N                                                                                                                 |                        | Water su Y                           | Y                          | 63536235                          |
| 51718869                      | Patkar (2014)                                                            | 0                                                          |                                      |                                                                        |                     |                                                                                                   |                                                               |                                                                                                              |                                                        |                                                                                                                   |                        |                                      |                            |                                   |
| 51705983                      | Schmitt (2018)                                                           | 1                                                          |                                      | Gonsalves G; Davoren, S (2                                             | 2015                | <a href="https://doi.org/10.1136/bmjgh-2015-000001">https://doi.org/10.1136/bmjgh-2015-000001</a> | Y                                                             |                                                                                                              |                                                        | Excluded                                                                                                          |                        |                                      |                            |                                   |
| 51716106                      | Sommer (2015)                                                            | 2                                                          |                                      | Jagori and Ul                                                          | 2011                |                                                                                                   | N                                                             |                                                                                                              |                                                        | N                                                                                                                 |                        | This artic N                         |                            | on topic/subject                  |
|                               |                                                                          |                                                            | Report                               | Jagori and Ul                                                          | 2011                |                                                                                                   | N                                                             |                                                                                                              |                                                        | N                                                                                                                 |                        | It is a tru N                        |                            | on topic/subject                  |
| 51708916                      | Sommer (2017)                                                            | 3                                                          |                                      | Crofts, T., Fis Garm, J.V., Gi Hennegan J, I                           | 2012                | <a href="https://doi.org/10.1136/bmjgh-2012-000001">https://doi.org/10.1136/bmjgh-2012-000001</a> | N                                                             |                                                                                                              |                                                        | N                                                                                                                 |                        | Menstru Y                            |                            | duplicate removed from Eppi       |
|                               |                                                                          |                                                            |                                      | Garm, J.V., Gi Hennegan J, I                                           | 2013                | <a href="https://doi.org/10.2166/was.2013.11.1">10.2166/was.2013.11.1</a>                         | N                                                             |                                                                                                              |                                                        | N                                                                                                                 |                        | We empl Y                            |                            | duplicate removed from Eppi       |
|                               |                                                                          |                                                            |                                      | Hennegan J, I                                                          | 2016                | <a href="https://doi.org/10.1136/bmjgh-2016-000001">https://doi.org/10.1136/bmjgh-2016-000001</a> | N                                                             |                                                                                                              |                                                        | N                                                                                                                 |                        | Unhygien N                           |                            | on study type (systematic review) |
| 51860770                      | Turley (2013)                                                            | 1                                                          |                                      | Butala NM, V                                                           | 2010                | <a href="https://doi.org/10.1016/j.iso.2010.04.001">10.1016/j.iso.2010.04.001</a>                 | Y                                                             |                                                                                                              |                                                        | Included                                                                                                          |                        |                                      |                            |                                   |
| 51705983                      | Schmitt (2018)                                                           | 5                                                          |                                      | Gonsalves G; Haque, S.E.; I O'Reilly, K. C Nawaz, J.; La De Lange, R.; | 2015                | <a href="https://doi.org/10.1136/bmjgh-2015-000001">https://doi.org/10.1136/bmjgh-2015-000001</a> | Y                                                             |                                                                                                              |                                                        | Excluded                                                                                                          |                        |                                      |                            |                                   |
|                               |                                                                          |                                                            |                                      | Haque, S.E.; I O'Reilly, K. C                                          | 2014                | <a href="https://doi.org/10.1136/bmjgh-2014-000001">10.1136/bmjgh-2014-000001</a>                 | N                                                             |                                                                                                              |                                                        | N                                                                                                                 |                        | Objective REPEAT (row 30)            |                            |                                   |
|                               |                                                                          |                                                            |                                      | O'Reilly, K. C                                                         | 2010                | <a href="https://doi.org/10.3362/1755-2638-100001">https://doi.org/10.3362/1755-2638-100001</a>   | N                                                             |                                                                                                              |                                                        | N                                                                                                                 |                        | Water su REPEAT (row 65)             |                            |                                   |
|                               |                                                                          |                                                            |                                      | Nawaz, J.; La De Lange, R.;                                            | 2010                | <a href="https://doi.org/10.3362/1755-2638-100001">https://doi.org/10.3362/1755-2638-100001</a>   | Y                                                             |                                                                                                              |                                                        | Included                                                                                                          |                        |                                      |                            |                                   |
|                               |                                                                          |                                                            |                                      | De Lange, R.;                                                          | 2014                | <a href="https://doi.org/10.3362/1755-2638-100001">10.3362/1755-2638-100001</a>                   | N                                                             |                                                                                                              |                                                        | N                                                                                                                 |                        | Mainstre Y                           | Y                          | 63536238                          |
| Summary                       | 46 reviews checked 49 potentially relevant papers of which 5 are reports |                                                            |                                      |                                                                        |                     |                                                                                                   |                                                               | 24 already included in Eppi of which 19 included, 5 excluded 25 not included in Eppi 25 not included in Eppi |                                                        | 12 included on abstract screening 10 excluded on abstract screening 3 duplicates                                  |                        | 8 added to Eppi 4 duplicates removed |                            |                                   |
|                               |                                                                          |                                                            |                                      |                                                                        |                     |                                                                                                   |                                                               | 21 paper: 5 excluded in Eppi 19 included in Eppi                                                             |                                                        | 13 included on title & abstract screening (inc. 2 reports) 12 excluded on title & abstract screening 2 duplicates |                        |                                      |                            |                                   |
