# Supplementary material for: Systematic mapping of gender equality and social inclusion in WASH interventions: knowledge clusters and gaps
Source: PubMed Central journal article supplement — BMJ Glob Health. 2023 Jan 24;8(1):e010850. doi: 10.1136/bmjgh-2022-010850 (PMC9884933; doi:10.1136/bmjgh-2022-010850), 2023-01-24
Supplement: bmjgh-2022-010850supp006.pdf [file bmjgh-2022-010850supp006.pdf]

Table S6: Meta-data coding scheme with definitions

| Domain                                                                   | Category                                                                                                                                                                                               | Description for authors                                                                                                                                                                                                                                                                                                                                                                                                                                                                                                                                                                                                                                                                                        |
|--------------------------------------------------------------------------|--------------------------------------------------------------------------------------------------------------------------------------------------------------------------------------------------------|----------------------------------------------------------------------------------------------------------------------------------------------------------------------------------------------------------------------------------------------------------------------------------------------------------------------------------------------------------------------------------------------------------------------------------------------------------------------------------------------------------------------------------------------------------------------------------------------------------------------------------------------------------------------------------------------------------------|
| Research Type                                                            | Quantitative                                                                                                                                                                                           | Analysis of numerical or categorical data collected using household surveys/questionnaires, observations (e.g. counts of handwashing, toilet use, water volume)                                                                                                                                                                                                                                                                                                                                                                                                                                                                                                                                                |
|                                                                          | Qualitative                                                                                                                                                                                            | Analysis of qualitative data (text, text, themes) collected via interviews (e.g. open answer, semi-structured, structured interviews), focus group interviews/discussions (FGDs), photovoice interviews and other types of interviews. This includes subjective experiences and interpretations of a phenomenon encountered by individuals, groups, etc.                                                                                                                                                                                                                                                                                                                                                       |
| Transformative outcome themes                                            | Self-confidence/efficacy                                                                                                                                                                               | Includes at least one QRS method and one QRS method that are combined. Both quantitative and qualitative data collected (e.g. different surveys, Diigo/Qualtrax, or Diigo/Qualtrax)                                                                                                                                                                                                                                                                                                                                                                                                                                                                                                                            |
|                                                                          | (Infer Theory of change)                                                                                                                                                                               | Change in reported self-confidence due to a WASH intervention                                                                                                                                                                                                                                                                                                                                                                                                                                                                                                                                                                                                                                                  |
| Inclusive outcome themes                                                 | Empowerment and agency                                                                                                                                                                                 | May be referenced directly or be measured by ability to make own decisions (e.g. regarding use, operation, maintenance, expenditure and planning of WASH services) at the household and community level or influence and meaningful participation in decision making within the WASH sector (e.g. local, national government)                                                                                                                                                                                                                                                                                                                                                                                  |
|                                                                          | Participation                                                                                                                                                                                          | Participation in community meetings, engagement of under-represented groups in design processes and WASH training                                                                                                                                                                                                                                                                                                                                                                                                                                                                                                                                                                                              |
|                                                                          | Physical safety and violence                                                                                                                                                                           | Violence directed against a person. It can be physical, sexual, psychological or economic harm or suffering, including threats of such acts, coercion or arbitrary deprivation of liberty, whether occurring in public or in private. Personal safety collecting water or using a sanitation facility                                                                                                                                                                                                                                                                                                                                                                                                          |
|                                                                          | (Non)discrimination & equality                                                                                                                                                                         | Change in access and use of a WASH facility based on ethnicity, race, nationality, language, religion, caste, sex/gender, age, disability and health conditions (e.g. HIV). i.e. access to sanitation that recognizes people are different and have different needs.                                                                                                                                                                                                                                                                                                                                                                                                                                           |
|                                                                          | Mental health and psychosocial outcomes                                                                                                                                                                | Psychosocial health scales, wellbeing scales                                                                                                                                                                                                                                                                                                                                                                                                                                                                                                                                                                                                                                                                   |
|                                                                          | Time use                                                                                                                                                                                               | Any type of time use, including time required to travel to access WASH service or facility (e.g. time for trip to collect water including waiting), or time for other economic or educational activities and similar                                                                                                                                                                                                                                                                                                                                                                                                                                                                                           |
|                                                                          | Education                                                                                                                                                                                              | Attainment of an educational goal (e.g. intellectual level, motivation, skills, interests, study habits, school attendance/ dropout rate)                                                                                                                                                                                                                                                                                                                                                                                                                                                                                                                                                                      |
|                                                                          | Gender and social attitudes, relations and norms                                                                                                                                                       | Reported changes in gender and social relations and attitudes (e.g. members of family start sharing water collection work, members of different ethnic groups sharing water source)                                                                                                                                                                                                                                                                                                                                                                                                                                                                                                                            |
|                                                                          | Economic and livelihood opportunities                                                                                                                                                                  | Job opportunities related to water or sanitation services (e.g. health workers, using multiple use water source for domestic and productive)                                                                                                                                                                                                                                                                                                                                                                                                                                                                                                                                                                   |
|                                                                          | ESG mainstreaming of service providers                                                                                                                                                                 | ESG mainstreaming of service providers                                                                                                                                                                                                                                                                                                                                                                                                                                                                                                                                                                                                                                                                         |
| Inclusive outcome themes                                                 | Mobility                                                                                                                                                                                               | Mobility inside and outside of home or similar                                                                                                                                                                                                                                                                                                                                                                                                                                                                                                                                                                                                                                                                 |
|                                                                          | Social capital                                                                                                                                                                                         | Social networks and relationships, shared values                                                                                                                                                                                                                                                                                                                                                                                                                                                                                                                                                                                                                                                               |
|                                                                          | (Infer Theory of change)                                                                                                                                                                               | Peace and non-violence of disorders derived from e.g. water carrying                                                                                                                                                                                                                                                                                                                                                                                                                                                                                                                                                                                                                                           |
|                                                                          | Physical health                                                                                                                                                                                        | Characteristics of a WASH service or facility, for example level of cleanliness of toilet facility, acceptability of service & safe water, type of washing option in toilet to accommodate religious practices, water supply continuity (water is available when needed)                                                                                                                                                                                                                                                                                                                                                                                                                                       |
|                                                                          | Service quality                                                                                                                                                                                        | Economic accessibility of WASH services, such as ability to pay for services without compromising other needs                                                                                                                                                                                                                                                                                                                                                                                                                                                                                                                                                                                                  |
|                                                                          | Affordability                                                                                                                                                                                          | Use of safe toilet facility. Access to a toilet facility does not guarantee use of a toilet facility                                                                                                                                                                                                                                                                                                                                                                                                                                                                                                                                                                                                           |
|                                                                          | Equitable access & use of safe sanitation                                                                                                                                                              | Use of safe water source (e.g. handpump, borewell), including filtered/ treated water (e.g. interventions looking at filter, volume of water consumed)                                                                                                                                                                                                                                                                                                                                                                                                                                                                                                                                                         |
|                                                                          | Equitable access & use of safe water supply                                                                                                                                                            | Ability to hygienically manage menstruation with existing facilities, could also be adequate washing and disposal opportunities                                                                                                                                                                                                                                                                                                                                                                                                                                                                                                                                                                                |
|                                                                          | Safe WASH                                                                                                                                                                                              | Hand-washing with soap (e.g. observed after latrine use)                                                                                                                                                                                                                                                                                                                                                                                                                                                                                                                                                                                                                                                       |
|                                                                          | Equitable access & use of HWF                                                                                                                                                                          | Knowledge about safe water handling, use of sanitation facility                                                                                                                                                                                                                                                                                                                                                                                                                                                                                                                                                                                                                                                |
| Population/subjects                                                      | Individuals                                                                                                                                                                                            | Individuals' beliefs about the extent to which other people who are important to them think they should or should not perform particular behaviors. Also includes change in gender attitudes (e.g. only men can be in leadership in the community, wife-beating attitudes)                                                                                                                                                                                                                                                                                                                                                                                                                                     |
|                                                                          | Adults (see subgroup)                                                                                                                                                                                  | Opportunities linked to WASH for people to socialize. For example, sometimes collecting water at a communal water point is an opportunity for women to socialize. Use of health services after improving WASH services at the facility                                                                                                                                                                                                                                                                                                                                                                                                                                                                         |
|                                                                          | Men                                                                                                                                                                                                    | Acquiring technical and managerial skills related to operating and managing WASH services                                                                                                                                                                                                                                                                                                                                                                                                                                                                                                                                                                                                                      |
|                                                                          | Women                                                                                                                                                                                                  | Investing into WASH software and hardware                                                                                                                                                                                                                                                                                                                                                                                                                                                                                                                                                                                                                                                                      |
|                                                                          | Children (below 5 and below 10)                                                                                                                                                                        | Subjects' beliefs is not disaggregated (e.g. outcomes measured at household level)                                                                                                                                                                                                                                                                                                                                                                                                                                                                                                                                                                                                                             |
|                                                                          | 0-17 (all)                                                                                                                                                                                             | Progressive 15 for non-eligible region                                                                                                                                                                                                                                                                                                                                                                                                                                                                                                                                                                                                                                                                         |
|                                                                          | 5-17 (all)                                                                                                                                                                                             | 0                                                                                                                                                                                                                                                                                                                                                                                                                                                                                                                                                                                                                                                                                                              |
|                                                                          | Below 12 (all)                                                                                                                                                                                         | 0                                                                                                                                                                                                                                                                                                                                                                                                                                                                                                                                                                                                                                                                                                              |
|                                                                          | Age above 65                                                                                                                                                                                           | Children not gender disaggregated                                                                                                                                                                                                                                                                                                                                                                                                                                                                                                                                                                                                                                                                              |
|                                                                          | Disability                                                                                                                                                                                             | 0                                                                                                                                                                                                                                                                                                                                                                                                                                                                                                                                                                                                                                                                                                              |
| WASH sector                                                              | Water                                                                                                                                                                                                  | Water supply provision and household water treatment for domestic use (drinking, personal hygiene, washing clothes, cleaning)                                                                                                                                                                                                                                                                                                                                                                                                                                                                                                                                                                                  |
|                                                                          | Sanitation                                                                                                                                                                                             | Access to and use of facilities and services for the safe disposal of human urine and faeces. A safe sanitation system separates human excreta from human contact and all parts of the sanitation services chain from toilet capture and containment through emptying, transport, treatment (in situ or off-site) and final disposal or end use. Safe waste management is considered part of the sanitation chain                                                                                                                                                                                                                                                                                              |
|                                                                          | Hand washing                                                                                                                                                                                           | Practices to use of hand-washing facilities (e.g. sinks with tap water,肥皂, taps, and jet or basins equipped for handwashing) including soap bar, liquid, powder detergent and soapy water. Ash, soil, sand and other traditional handwashing agents are less effective and do not count as 'soaps'                                                                                                                                                                                                                                                                                                                                                                                                             |
|                                                                          | Menstrual hygiene management                                                                                                                                                                           | Women and adolescent girls are using a clean menstrual management material to absorb or collect menstrual blood, that can be changed in privacy as often as necessary for the duration of a menstrual period, using soap and water for washing the body as required, and having access to safe and convenient facilities to dispose of used menstrual management materials. They understand the basic facts linked to the menstrual cycle and how to manage it with dignity and without discomfort or fear                                                                                                                                                                                                     |
|                                                                          | Oral hygiene                                                                                                                                                                                           | Personal hygiene (e.g. hygiene, bathing, NOT dental hygiene) domestic hygiene (cleaning surfaces, laundry, etc.)                                                                                                                                                                                                                                                                                                                                                                                                                                                                                                                                                                                               |
|                                                                          | Behaviour change                                                                                                                                                                                       | Promotion of changed water, sanitation and hygiene behaviour, such as CLTS approaches, hygiene promotion                                                                                                                                                                                                                                                                                                                                                                                                                                                                                                                                                                                                       |
|                                                                          | BC Tripping                                                                                                                                                                                            | Use of behavioral factors derived from psychosocial theories (e.g. emotions or social pressure) to motivate BC CLTS (see example)                                                                                                                                                                                                                                                                                                                                                                                                                                                                                                                                                                              |
|                                                                          | BC Health Messaging                                                                                                                                                                                    | Creative educational approach designed to help individuals, or communities, improve their health through increasing their knowledge and/or skills                                                                                                                                                                                                                                                                                                                                                                                                                                                                                                                                                              |
|                                                                          | Infrastructure provision                                                                                                                                                                               | Direct provision of technologies such as water supply, sanitation or hygiene infrastructure, including water filters, soap bars, toilet slabs, waste storage containers etc.                                                                                                                                                                                                                                                                                                                                                                                                                                                                                                                                   |
|                                                                          | Training and capacity development                                                                                                                                                                      | Training and education activities, technical support                                                                                                                                                                                                                                                                                                                                                                                                                                                                                                                                                                                                                                                           |
| Intervention: WASH components                                            | Product provision                                                                                                                                                                                      | Provision of consumable materials or technologies that are distributed to individuals or households such as hygiene kits, menstrual pads and other products, water treatment tablets, SODIS bottles, mobile can for handwashing (e.g. pitcher), peepoo bags and soap. Distribution may be one-time or ongoing during the intervention                                                                                                                                                                                                                                                                                                                                                                          |
|                                                                          | Policy intervention                                                                                                                                                                                    | Adoption of WASH regional or national policy, such as national DDP target                                                                                                                                                                                                                                                                                                                                                                                                                                                                                                                                                                                                                                      |
|                                                                          | Service provider                                                                                                                                                                                       | Intervention targeted to the service provider (e.g. WASH budgeting, service delivery and performance, monitoring)                                                                                                                                                                                                                                                                                                                                                                                                                                                                                                                                                                                              |
|                                                                          | Marketing-based approaches                                                                                                                                                                             | Building the WASH market of goods and services (e.g. training masons, promotion/demand creation, distribution, and sales of products and services to consumers)                                                                                                                                                                                                                                                                                                                                                                                                                                                                                                                                                |
|                                                                          | Tariffs, loans, subsidy                                                                                                                                                                                | Provision of financial instruments, such as toilet purchasing subsidies (or in-kind materials), pro-poor tariffs, or loans for WASH services (e.g. upfront connection costs)                                                                                                                                                                                                                                                                                                                                                                                                                                                                                                                                   |
|                                                                          | Operation and maintenance (O&M)                                                                                                                                                                        | Rehabilitation or maintenance interventions of pre-existing infrastructure, such as boreholes or latrines that have broken down                                                                                                                                                                                                                                                                                                                                                                                                                                                                                                                                                                                |
|                                                                          | Water                                                                                                                                                                                                  | As stated in the publication                                                                                                                                                                                                                                                                                                                                                                                                                                                                                                                                                                                                                                                                                   |
|                                                                          | Oral and informal activities                                                                                                                                                                           | As stated in the publication                                                                                                                                                                                                                                                                                                                                                                                                                                                                                                                                                                                                                                                                                   |
|                                                                          | Other                                                                                                                                                                                                  | As stated in the publication                                                                                                                                                                                                                                                                                                                                                                                                                                                                                                                                                                                                                                                                                   |
|                                                                          | Other                                                                                                                                                                                                  | As stated in the publication                                                                                                                                                                                                                                                                                                                                                                                                                                                                                                                                                                                                                                                                                   |
| Does intervention include QRS component?                                 | Sample of inclusive components                                                                                                                                                                         | Examples of transformative components:                                                                                                                                                                                                                                                                                                                                                                                                                                                                                                                                                                                                                                                                         |
|                                                                          | • Training to specific times of day to accommodate men or women                                                                                                                                        | • Social and behavioural change components related to gender or social equality                                                                                                                                                                                                                                                                                                                                                                                                                                                                                                                                                                                                                                |
|                                                                          | • WASH facilities in school                                                                                                                                                                            | • Interventions to change gender attitudes (e.g. GBV, in a household decision-making, including (transforming men's engagement on shared work)                                                                                                                                                                                                                                                                                                                                                                                                                                                                                                                                                                 |
|                                                                          | • Disability inclusive WASH infrastructure                                                                                                                                                             | • Micro-credit and financial/income groups for women or poor (or marginalized) groups                                                                                                                                                                                                                                                                                                                                                                                                                                                                                                                                                                                                                          |
|                                                                          | • Improved safety (e.g. improved toilets, lighting in informal settlements)                                                                                                                            | • WASH to train women or under-represented groups in WASH leadership, WASH maintenance, service provider (public or private)                                                                                                                                                                                                                                                                                                                                                                                                                                                                                                                                                                                   |
|                                                                          | • Women's advocacy groups or women's support groups                                                                                                                                                    | • Multi-use water initiatives to promote women's economic empowerment                                                                                                                                                                                                                                                                                                                                                                                                                                                                                                                                                                                                                                          |
|                                                                          | • Women's advocacy groups or women's support groups                                                                                                                                                    | • Gender mainstreaming at service provider level (e.g. implementing specific for staffing, gender-specific indicators in monitoring)                                                                                                                                                                                                                                                                                                                                                                                                                                                                                                                                                                           |
|                                                                          | Intervention target scale                                                                                                                                                                              | The scale at which the intervention is targeted. The level at which the intervention is targeted may be different to the level at which it is implemented and is studied.                                                                                                                                                                                                                                                                                                                                                                                                                                                                                                                                      |
|                                                                          | Individual                                                                                                                                                                                             | Intervention is to a specific individual, rather than entire households. This may include interventions aiming to improve individual's attitudes or specific people's behaviours.                                                                                                                                                                                                                                                                                                                                                                                                                                                                                                                              |
|                                                                          | Household                                                                                                                                                                                              | Intervention at the household level. This includes interventions that target household but that are implemented at the community level (e.g. CLTS, communal water points)                                                                                                                                                                                                                                                                                                                                                                                                                                                                                                                                      |
| Household grouping                                                       | Interventions targeting household groups, usually within a compound house. Compound housing refers to multiple rooms dwellings where multiple households live together, often sharing their facilities |                                                                                                                                                                                                                                                                                                                                                                                                                                                                                                                                                                                                                                                                                                                |
| Public area (school, healthcare facility, market, religious venue, etc.) | Intervention targeted at a public area (school, health centre, market, etc.)                                                                                                                           |                                                                                                                                                                                                                                                                                                                                                                                                                                                                                                                                                                                                                                                                                                                |
| Service provider                                                         | Intervention targeted at service providers, for example, water utilities, municipalities and job employers, any other roles, including religious role                                                  |                                                                                                                                                                                                                                                                                                                                                                                                                                                                                                                                                                                                                                                                                                                |
| Other                                                                    | Intervention targeted at other roles, including religious role                                                                                                                                         |                                                                                                                                                                                                                                                                                                                                                                                                                                                                                                                                                                                                                                                                                                                |
| Experimental design                                                      | Random experiment with random allocation to groups                                                                                                                                                     | The evaluation must: (i) compare two or more groups which receive different interventions or different intensities/levels of an intervention with each other; and/or with a group which does not receive any intervention at all AND (ii) allocate participants (individuals, groups, classes, schools, LEAs etc) or sequences to the different groups based on a fully random schedule (e.g. a random numbers table is used). If the report states that random allocation was used and no further information is given then please keyword as RCT. If the allocation is NOT fully randomized (e.g. allocation by alternate numbers by date of birth) then please keyword as a non-randomised controlled trial |
|                                                                          | Experiment with non-random allocation to groups                                                                                                                                                        | The evaluation compared two or more groups which receive different interventions, or different intensities/levels of an intervention to each other and/or with a group which does not receive any intervention at all BUT DOES NOT allocate participants (individuals, groups, classes, schools, LEAs etc) or sequences in a fully random manner. This keyword should be used for studies which describe groups being allocated using a quasi-random method (e.g. allocation by alternate numbers or by date of birth) or other non-random method                                                                                                                                                              |
|                                                                          | One group pre-post test                                                                                                                                                                                | A group of subjects is tested on outcome of interest before being given an intervention which is being evaluated. After receiving the intervention the same test is administered again to the same subjects. The outcome is the difference between the pre and post test scores of the subjects.                                                                                                                                                                                                                                                                                                                                                                                                               |
|                                                                          | One group post-test only                                                                                                                                                                               | One group of subjects is tested on outcome of interest after receiving the intervention which is being evaluated.                                                                                                                                                                                                                                                                                                                                                                                                                                                                                                                                                                                              |
|                                                                          | Cohort study                                                                                                                                                                                           | Researchers prospectively study a sample (e.g. learners), collect data on the different aspects of policies or practices experienced by members of the sample (e.g. teaching methods, class sizes), look forward in time to measure their later outcomes (e.g. achievement) and compare the experiences to the outcomes achieved. The purpose is to assess the effect of the different experiences on outcomes.                                                                                                                                                                                                                                                                                                |
|                                                                          | Case-control study                                                                                                                                                                                     | Researchers compare two or more groups of individuals on the basis of their current situation (e.g. 15 year old pupils with high current educational performance compared to those with average educational performance), and look back in time to examine the statistical association with different policies or practices which they have experienced (e.g. class size, attendance at single sex or mixed sex schools, non-school activities etc.)                                                                                                                                                                                                                                                           |
|                                                                          | Survey                                                                                                                                                                                                 | Researchers have used a questionnaire to collect quantitative information about items in a sample or population (e.g. views on WASH infrastructure)                                                                                                                                                                                                                                                                                                                                                                                                                                                                                                                                                            |
|                                                                          | Views study (phenomenology)                                                                                                                                                                            | Researchers try to understand a particular phenomenon from the point of the 'viewpoint' of a particular, group, culture or society. In these studies there is attention to subjective meaning, perspectives and experience. It involves the study of subjective, lived experiences and perspectives of participants.                                                                                                                                                                                                                                                                                                                                                                                           |
|                                                                          | Ethnography                                                                                                                                                                                            | Researchers present a qualitative description of human culture, based on fieldwork. The goal of ethnographic research is to describe and interpret a cultural or social group.                                                                                                                                                                                                                                                                                                                                                                                                                                                                                                                                 |
|                                                                          | Case study                                                                                                                                                                                             | Researchers refer specifically to their 'descriptive' approach as a case study.                                                                                                                                                                                                                                                                                                                                                                                                                                                                                                                                                                                                                                |
| Qualitative description                                                  | Other observational studies, 'without' (reference to) a particular qualitative methodological approach, but with a qualitative data collection and analysis (e.g. interviews or focus groups)          |                                                                                                                                                                                                                                                                                                                                                                                                                                                                                                                                                                                                                                                                                                                |
| Grounded theory                                                          | Researchers refer specifically to their 'descriptive' approach as a 'grounded theory design'                                                                                                           |                                                                                                                                                                                                                                                                                                                                                                                                                                                                                                                                                                                                                                                                                                                |
