# Supplementary material for: Systematic mapping of gender equality and social inclusion in WASH interventions: knowledge clusters and gaps
Source: PubMed Central journal article supplement — BMJ Glob Health. 2023 Jan 24;8(1):e010850. doi: 10.1136/bmjgh-2022-010850 (PMC9884933; doi:10.1136/bmjgh-2022-010850), 2023-01-24

The image shows a very narrow and tall table, likely a data table or a list of references. The table has many columns and rows, with text and numbers. The text is too small to read, but the structure appears to be a standard table with multiple columns and many rows of data. The table is oriented vertically on the page.

A very narrow vertical table with illegible text, likely representing a list of countries or regions and their corresponding data points. The text is too small to be read.





Supplement: bmjgh-2022-010850supp007.pdf [file bmjgh-2022-010850supp007.pdf]
