# Supplementary material for: Systematic mapping of gender equality and social inclusion in WASH interventions: knowledge clusters and gaps
Source: PubMed Central journal article supplement — BMJ Glob Health. 2023 Jan 24;8(1):e010850. doi: 10.1136/bmjgh-2022-010850 (PMC9884933; doi:10.1136/bmjgh-2022-010850), 2023-01-24
Supplement: bmjgh-2022-010850supp009.pdf [file bmjgh-2022-010850supp009.pdf]

**Table S7: Distribution of studies per country and region.** Study location counts include both single- and multi-site studies. Classification of the regions is taken from the World Bank's country and lending group list [1]. LDC stands for least developed country, and LMIC stand for low-to-middle-income country.

[1] World Bank. World Bank Country and Lending Groups (July 2020). Accessed 1 September 2020; Available from: <https://datahelpdesk.worldbank.org/knowledgebase/articles/906519-world-bank-country-and-lending-groups>.

[2] UNCTAD, The least developed countries in the post-COVID world: Learning from 50 years of experience. 2021, UN. Available from: [https://unctad.org/system/files/official-document/ldc2021\\_en.pdf](https://unctad.org/system/files/official-document/ldc2021_en.pdf)

| Region                                    | Country            | Study location count | LMIC [1] or LDC [2] status |
|-------------------------------------------|--------------------|----------------------|----------------------------|
| Latin America & Caribbean<br>(50 studies) | Bolivia            | 8                    | Other LMIC                 |
|                                           | Brazil             | 7                    | Other LMIC                 |
|                                           | Haiti              | 7                    | LDC                        |
|                                           | Mexico             | 5                    | Other LMIC                 |
|                                           | Peru               | 5                    | Other LMIC                 |
|                                           | Guatemala          | 4                    | Other LMIC                 |
|                                           | Colombia           | 3                    | Other LMIC                 |
|                                           | El Salvador        | 3                    | Other LMIC                 |
|                                           | Argentina          | 2                    | Other LMIC                 |
|                                           | Nicaragua          | 2                    | Other LMIC                 |
|                                           | Dominican Republic | 1                    | Other LMIC                 |
|                                           | Ecuador            | 1                    | Other LMIC                 |
| Guyana                                    | 1                  | Other LMIC           |                            |
| Venezuela                                 | 1                  | Other LMIC           |                            |
| South Asia (145)                          | India              | 81                   | Other LMIC                 |
|                                           | Bangladesh         | 49                   | LDC                        |
|                                           | Nepal              | 9                    | LDC                        |
|                                           | Pakistan           | 4                    | Other LMIC                 |
|                                           | Afghanistan        | 1                    | LDC                        |
|                                           | Sri Lanka          | 1                    | Other LMIC                 |
| East Asia & Pacific (47)                  | Indonesia          | 13                   | Other LMIC                 |
|                                           | China              | 8                    | Other LMIC                 |
|                                           | Vietnam            | 5                    | Other LMIC                 |
|                                           | Lao                | 5                    | LDC                        |
|                                           | Philippines        | 5                    | Other LMIC                 |
|                                           | Cambodia           | 3                    | LDC                        |
|                                           | Fiji               | 1                    | Other LMIC                 |
|                                           | Malaysia           | 2                    | Other LMIC                 |
|                                           | Thailand           | 2                    | Other LMIC                 |
|                                           | Timor-Leste        | 2                    | LDC                        |
| Vanuatu                                   | 1                  | Other LMIC           |                            |
| Europe & Central Asia (3)                 | Turkey             | 2                    | Other LMIC                 |
|                                           | Uzbekistan         | 1                    | Other LMIC                 |
| Sub-Saharan Africa (238)                  | Kenya              | 62                   | Other LMIC                 |
|                                           | Tanzania           | 28                   | LDC                        |
|                                           | Uganda             | 24                   | LDC                        |
|                                           | Ethiopia           | 19                   | LDC                        |
|                                           | Ghana              | 18                   | Other LMIC                 |
|                                           | Malawi             | 18                   | LDC                        |
|                                           | South Africa       | 12                   | Other LMIC                 |
|                                           | Zambia             | 12                   | LDC                        |
|                                           | Mozambique         | 8                    | LDC                        |
|                                           | Rwanda             | 6                    | LDC                        |
|                                           | Burkina Faso       | 5                    | LDC                        |
|                                           | Zimbabwe           | 5                    | Other LMIC                 |
|                                           | Mali               | 4                    | LDC                        |
|                                           | Nigeria            | 4                    | Other LMIC                 |
|                                           | Congo, Dem. Rep.   | 2                    | LDC                        |
|                                           | Liberia            | 2                    | LDC                        |
|                                           | Eswatini           | 2                    | Other LMIC                 |
|                                           | Burundi            | 1                    | LDC                        |
|                                           | Cameroon           | 1                    | Other LMIC                 |
|                                           | Chad               | 1                    | LDC                        |
|                                           | Gambia, The        | 1                    | Other LMIC                 |
| Namibia                                   | 1                  | Other LMIC           |                            |
| Senegal                                   | 1                  | LDC                  |                            |
| Sudan                                     | 1                  | LDC                  |                            |
| Middle East & North Africa<br>(10)        | Yemen              | 3                    | LDC                        |
|                                           | Iraq               | 2                    | Other LMIC                 |
|                                           | Jordan             | 2                    | Other LMIC                 |
|                                           | Morocco            | 2                    | Other LMIC                 |
|                                           | Iran               | 1                    | Other LMIC                 |
