# Supplementary material for: Systematic mapping of gender equality and social inclusion in WASH interventions: knowledge clusters and gaps
Source: PubMed Central journal article supplement — BMJ Glob Health. 2023 Jan 24;8(1):e010850. doi: 10.1136/bmjgh-2022-010850 (PMC9884933; doi:10.1136/bmjgh-2022-010850), 2023-01-24

**Figure S14: Distribution of transformative (a) and inclusive (b) outcome themes reported across interventions with and without GESI components.**

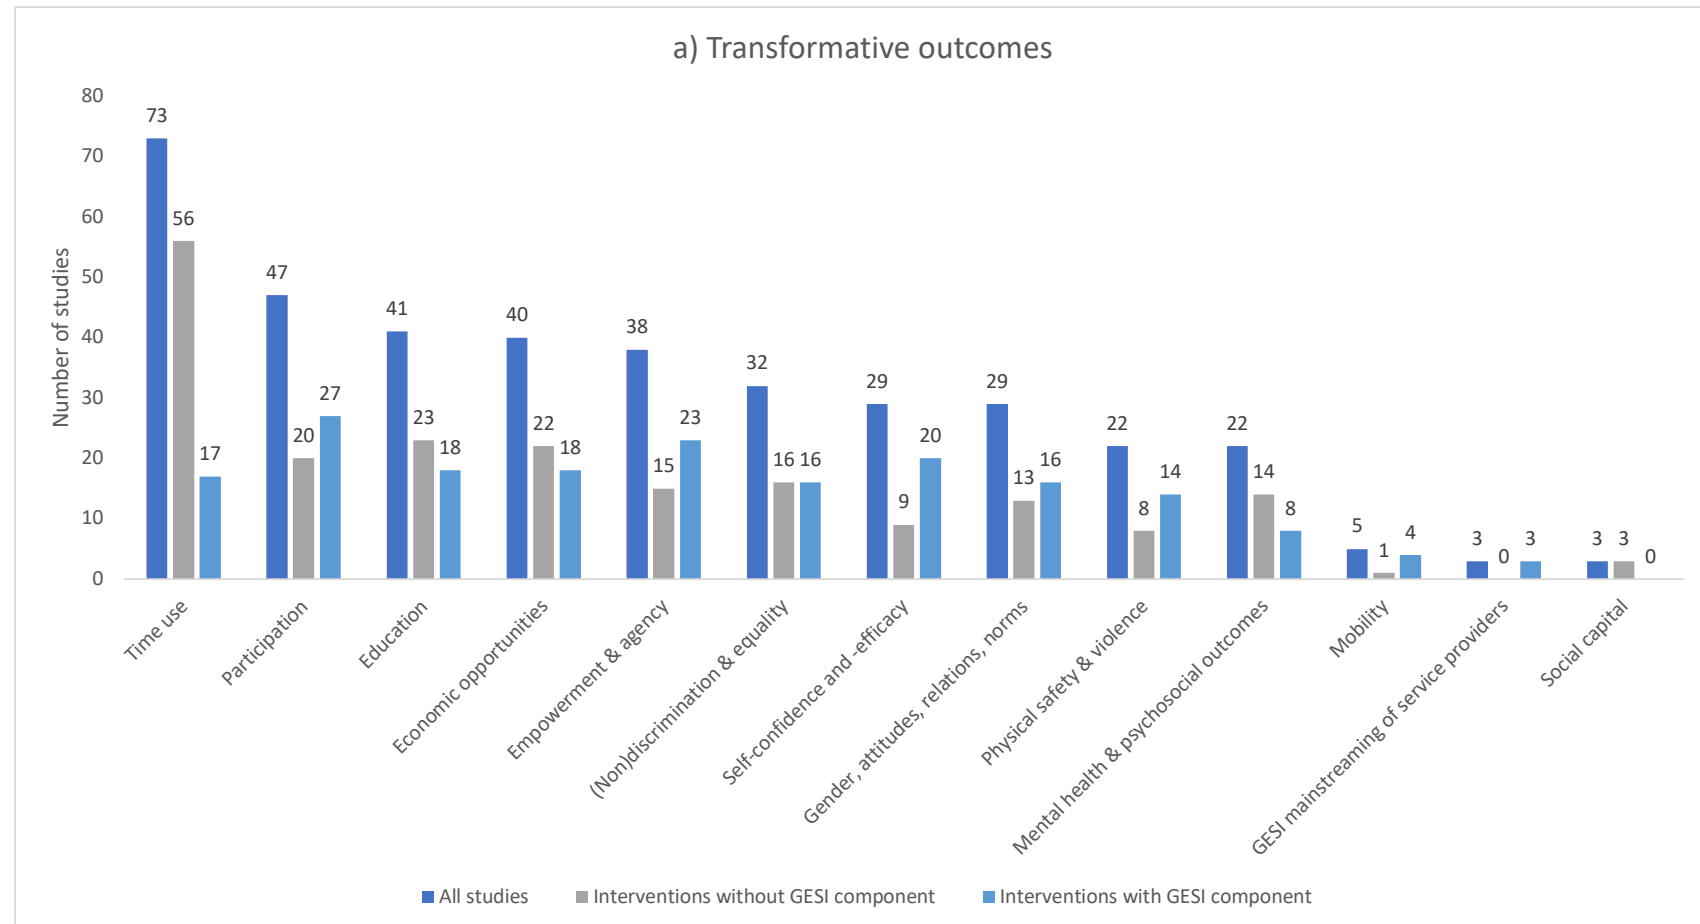

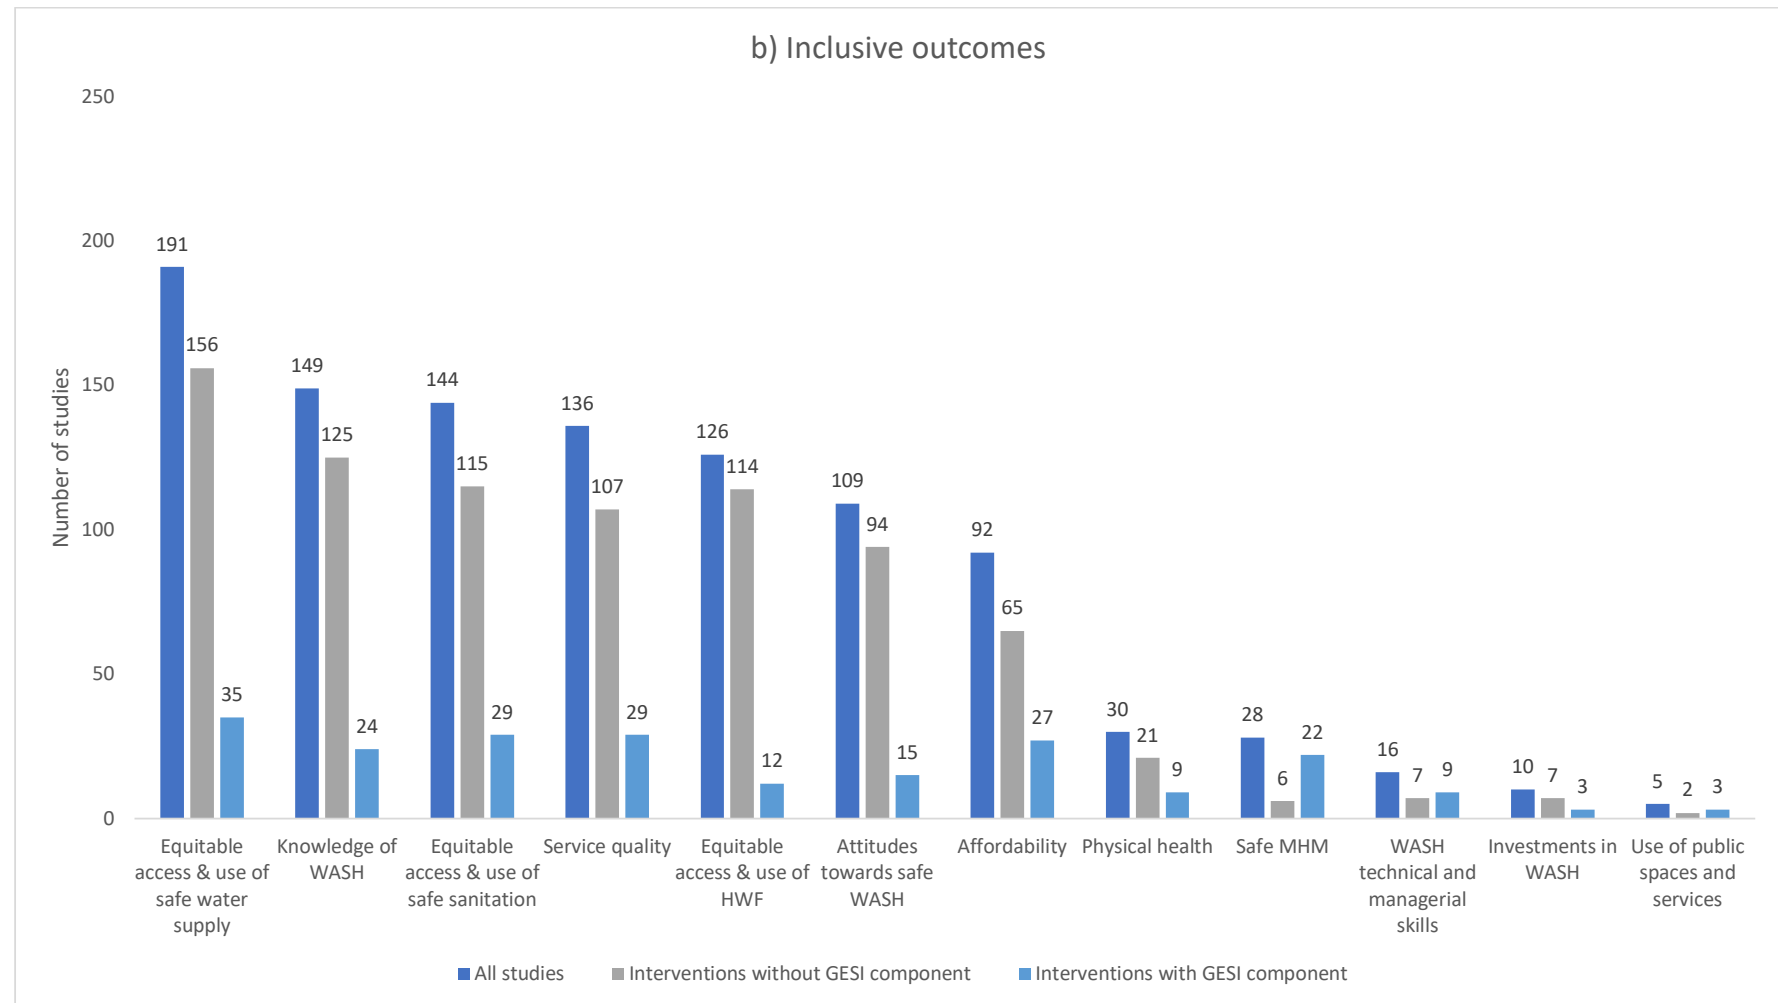

Supplement: bmjgh-2022-010850supp021.pdf [file bmjgh-2022-010850supp021.pdf]
