# Supplementary material for: Systematic mapping of gender equality and social inclusion in WASH interventions: knowledge clusters and gaps
Source: PubMed Central journal article supplement — BMJ Glob Health. 2023 Jan 24;8(1):e010850. doi: 10.1136/bmjgh-2022-010850 (PMC9884933; doi:10.1136/bmjgh-2022-010850), 2023-01-24
Supplement: bmjgh-2022-010850supp022.pdf [file bmjgh-2022-010850supp022.pdf]

**Table S8: Heatmap of outcome themes distributed across the top three most frequent research locations: India, Kenya and Bangladesh.**  
Greens represent (potential) evidence clusters and reds represent (potential) evidence gaps.

| Outcome themes                            | Inclusive or transformative? | All top 3 locations (% of all studies) | India (% of all studies)  | Kenya (% of all studies)  | Bangladesh (% of all studies)  |
|-------------------------------------------|------------------------------|----------------------------------------|--------------------------------------------------------------------------------------------------------------|--------------------------------------------------------------------------------------------------------------|-------------------------------------------------------------------------------------------------------------------|
| GESI mainstreaming of service providers   | Transformative               | 67%                                    | 0%                                                                                                           | 0%                                                                                                           | 67%                                                                                                               |
| Mobility                                  | Inclusive                    | 60%                                    | 60%                                                                                                          | 0%                                                                                                           | 0%                                                                                                                |
| Economic opportunities                    | Transformative               | 55%                                    | 23%                                                                                                          | 25%                                                                                                          | 8%                                                                                                                |
| (Non)discrimination & equality            | Transformative               | 53%                                    | 28%                                                                                                          | 19%                                                                                                          | 6%                                                                                                                |
| Education                                 | Transformative               | 51%                                    | 15%                                                                                                          | 29%                                                                                                          | 7%                                                                                                                |
| Time use                                  | Transformative               | 51%                                    | 21%                                                                                                          | 21%                                                                                                          | 10%                                                                                                               |
| Affordability                             | Inclusive                    | 46%                                    | 17%                                                                                                          | 18%                                                                                                          | 10%                                                                                                               |
| Physical safety & violence                | Transformative               | 45%                                    | 32%                                                                                                          | 9%                                                                                                           | 5%                                                                                                                |
| Attitudes towards safe WASH               | Inclusive                    | 45%                                    | 23%                                                                                                          | 9%                                                                                                           | 13%                                                                                                               |
| Gender, attitudes, relations, norms       | Transformative               | 45%                                    | 34%                                                                                                          | 3%                                                                                                           | 7%                                                                                                                |
| WASH technical and managerial skills      | Inclusive                    | 44%                                    | 13%                                                                                                          | 25%                                                                                                          | 6%                                                                                                                |
| Physical health                           | Inclusive                    | 43%                                    | 17%                                                                                                          | 20%                                                                                                          | 7%                                                                                                                |
| Service quality                           | Inclusive                    | 43%                                    | 15%                                                                                                          | 17%                                                                                                          | 10%                                                                                                               |
| Equitable access & use of HWF             | Inclusive                    | 42%                                    | 14%                                                                                                          | 15%                                                                                                          | 13%                                                                                                               |
| Equitable access & use of safe sanitation | Inclusive                    | 41%                                    | 22%                                                                                                          | 10%                                                                                                          | 9%                                                                                                                |
| Mental health & psychosocial outcomes     | Transformative               | 41%                                    | 23%                                                                                                          | 18%                                                                                                          | 0%                                                                                                                |
| Knowledge of WASH                         | Inclusive                    | 40%                                    | 17%                                                                                                          | 11%                                                                                                          | 12%                                                                                                               |
| Investments in WASH                       | Inclusive                    | 40%                                    | 20%                                                                                                          | 10%                                                                                                          | 10%                                                                                                               |
| Use of public spaces and services         | Transformative               | 40%                                    | 20%                                                                                                          | 20%                                                                                                          | 0%                                                                                                                |
| Safe MHM                                  | Inclusive                    | 39%                                    | 18%                                                                                                          | 18%                                                                                                          | 4%                                                                                                                |
| Equitable access & use of safe water supp | Inclusive                    | 38%                                    | 9%                                                                                                           | 16%                                                                                                          | 13%                                                                                                               |
| Self-confidence and -efficacy             | Transformative               | 34%                                    | 21%                                                                                                          | 10%                                                                                                          | 3%                                                                                                                |
| Empowerment & agency                      | Transformative               | 34%                                    | 18%                                                                                                          | 5%                                                                                                           | 11%                                                                                                               |
| Participation                             | Transformative               | 32%                                    | 15%                                                                                                          | 9%                                                                                                           | 9%                                                                                                                |
| Social capital                            | Transformative               | 0%                                     | 0%                                                                                                           | 0%                                                                                                           | 0%                                                                                                                |
