# Supplementary material for: Systematic mapping of gender equality and social inclusion in WASH interventions: knowledge clusters and gaps
Source: PubMed Central journal article supplement — BMJ Glob Health. 2023 Jan 24;8(1):e010850. doi: 10.1136/bmjgh-2022-010850 (PMC9884933; doi:10.1136/bmjgh-2022-010850), 2023-01-24
Supplement: bmjgh-2022-010850supp023.pdf [file bmjgh-2022-010850supp023.pdf]

**Table S9: Heatmap of outcome themes distributed across water, sanitation, handwashing, menstrual hygiene management (MHM) and other hygiene.** Greens represent (potential) evidence clusters and reds represent (potential) evidence gaps. One study can report on multiple outcomes and WASH sectors.

| Outcome themes                              | Inclusive or transformative? | Water supply (% of studies) | Sanitation (% of all studies) | Handwashing (% of all studies) | MHM (% of all studies) | Other hygiene (% of all studies) |
|---------------------------------------------|------------------------------|-----------------------------|-------------------------------|--------------------------------|------------------------|----------------------------------|
| Empowerment & agency                        | Inclusive                    | 76%                         | 47%                           | 11%                            | 0%                     | 0%                               |
| Affordability                               | Inclusive                    | 71%                         | 32%                           | 12%                            | 5%                     | 0%                               |
| Physical safety & violence                  | Inclusive                    | 27%                         | 86%                           | 14%                            | 14%                    | 0%                               |
| Mental health & psychosocial outcomes       | Inclusive                    | 45%                         | 32%                           | 14%                            | 18%                    | 0%                               |
| Gender, attitudes, relations, norms         | Inclusive                    | 69%                         | 41%                           | 14%                            | 10%                    | 0%                               |
| Participation                               | Inclusive                    | 81%                         | 43%                           | 15%                            | 0%                     | 0%                               |
| Service quality                             | Inclusive                    | 63%                         | 53%                           | 21%                            | 4%                     | 1%                               |
| Equitable access & use of safe water supply | Inclusive                    | 95%                         | 29%                           | 24%                            | 1%                     | 2%                               |
| Equitable access & use of safe sanitation   | Inclusive                    | 37%                         | 97%                           | 30%                            | 2%                     | 1%                               |
| Attitudes towards safe WASH                 | Inclusive                    | 34%                         | 50%                           | 46%                            | 4%                     | 5%                               |
| Knowledge of WASH                           | Inclusive                    | 46%                         | 44%                           | 52%                            | 5%                     | 3%                               |
| Equitable access & use of HWF               | Inclusive                    | 40%                         | 42%                           | 87%                            | 2%                     | 3%                               |
| Mobility                                    | Transformative               | 40%                         | 60%                           | 0%                             | 0%                     | 0%                               |
| GESI mainstreaming of service providers     | Transformative               | 100%                        | 0%                            | 0%                             | 0%                     | 0%                               |
| (Non)discrimination & equality              | Transformative               | 69%                         | 53%                           | 6%                             | 0%                     | 0%                               |
| Time use                                    | Transformative               | 92%                         | 34%                           | 11%                            | 0%                     | 0%                               |
| Economic opportunities                      | Transformative               | 78%                         | 45%                           | 13%                            | 5%                     | 0%                               |
| Physical health                             | Transformative               | 67%                         | 37%                           | 17%                            | 7%                     | 0%                               |
| Self-confidence and -efficacy               | Transformative               | 69%                         | 45%                           | 17%                            | 17%                    | 0%                               |
| Safe MHM                                    | Transformative               | 11%                         | 32%                           | 18%                            | 75%                    | 0%                               |
| WASH technical and managerial skills        | Transformative               | 75%                         | 44%                           | 19%                            | 0%                     | 0%                               |
| Use of public spaces and services           | Transformative               | 80%                         | 40%                           | 20%                            | 0%                     | 0%                               |
| Education                                   | Transformative               | 44%                         | 44%                           | 29%                            | 29%                    | 0%                               |
| Social capital                              | Transformative               | 67%                         | 67%                           | 33%                            | 0%                     | 0%                               |
| Investments in WASH                         | Transformative               | 30%                         | 40%                           | 50%                            | 0%                     | 0%                               |
