# Supplementary material for: Systematic mapping of gender equality and social inclusion in WASH interventions: knowledge clusters and gaps
Source: PubMed Central journal article supplement — BMJ Glob Health. 2023 Jan 24;8(1):e010850. doi: 10.1136/bmjgh-2022-010850 (PMC9884933; doi:10.1136/bmjgh-2022-010850), 2023-01-24
Supplement: bmjgh-2022-010850supp024.pdf [file bmjgh-2022-010850supp024.pdf]

**Table S10: Heatmap of outcome themes distributed across intervention implementation settings.** Greens represent (potential) evidence clusters and reds represent (potential) evidence gaps. One study can report on multiple outcomes and settings

| Outcome themes                            | Inclusive or transformative? | Rural (% of all studies) | Urban (% of all studies) | Slums (% of all studies) | Under (% of all studies) | Peri-urban (% of all studies) | Emergency settings (% of all studies) | Ex-conflict (% of all studies) |
|-------------------------------------------|------------------------------|--------------------------|--------------------------|--------------------------|--------------------------|-------------------------------|---------------------------------------|--------------------------------|
| WASH technical and managerial skills      | Inclusive                    | 56%                      | 38%                      | 13%                      | 0%                       | 0%                            | 0%                                    | 0%                             |
| Use of public spaces and services         | Inclusive                    | 100%                     | 0%                       | 0%                       | 0%                       | 0%                            | 0%                                    | 0%                             |
| Physical health                           | Inclusive                    | 80%                      | 10%                      | 7%                       | 3%                       | 7%                            | 0%                                    | 0%                             |
| Affordability                             | Inclusive                    | 65%                      | 24%                      | 20%                      | 4%                       | 3%                            | 1%                                    | 1%                             |
| Equitable access & use of safe water supp | Inclusive                    | 71%                      | 17%                      | 8%                       | 7%                       | 3%                            | 2%                                    | 0%                             |
| Attitudes towards safe WASH               | Inclusive                    | 81%                      | 13%                      | 6%                       | 7%                       | 3%                            | 1%                                    | 0%                             |
| Service quality                           | Inclusive                    | 63%                      | 18%                      | 14%                      | 8%                       | 4%                            | 4%                                    | 0%                             |
| Equitable access & use of safe sanitation | Inclusive                    | 73%                      | 11%                      | 10%                      | 8%                       | 2%                            | 3%                                    | 0%                             |
| Investments in WASH                       | Inclusive                    | 70%                      | 20%                      | 10%                      | 10%                      | 0%                            | 0%                                    | 0%                             |
| Knowledge of WASH                         | Inclusive                    | 74%                      | 17%                      | 4%                       | 11%                      | 2%                            | 2%                                    | 0%                             |
| Equitable access & use of HWF             | Inclusive                    | 64%                      | 21%                      | 7%                       | 13%                      | 5%                            | 2%                                    | 0%                             |
| Safe MHM                                  | Inclusive                    | 54%                      | 18%                      | 11%                      | 18%                      | 7%                            | 4%                                    | 4%                             |
| GESI mainstreaming of service providers   | Transformative               | 33%                      | 33%                      | 33%                      | 0%                       | 0%                            | 0%                                    | 0%                             |
| Physical safety & violence                | Transformative               | 45%                      | 18%                      | 32%                      | 0%                       | 0%                            | 9%                                    | 0%                             |
| Social capital                            | Transformative               | 67%                      | 33%                      | 0%                       | 0%                       | 0%                            | 0%                                    | 0%                             |
| Mental health & psychosocial outcomes     | Transformative               | 73%                      | 14%                      | 18%                      | 0%                       | 14%                           | 0%                                    | 5%                             |
| Mobility                                  | Transformative               | 80%                      | 0%                       | 20%                      | 0%                       | 0%                            | 0%                                    | 0%                             |
| (Non)discrimination & equality            | Transformative               | 69%                      | 22%                      | 16%                      | 3%                       | 3%                            | 0%                                    | 0%                             |
| Participation                             | Transformative               | 81%                      | 13%                      | 0%                       | 4%                       | 4%                            | 2%                                    | 0%                             |
| Education                                 | Transformative               | 73%                      | 22%                      | 7%                       | 5%                       | 7%                            | 0%                                    | 2%                             |
| Economic opportunities                    | Transformative               | 70%                      | 13%                      | 13%                      | 5%                       | 0%                            | 0%                                    | 0%                             |
| Empowerment & agency                      | Transformative               | 66%                      | 16%                      | 16%                      | 5%                       | 0%                            | 0%                                    | 0%                             |
| Self-confidence and -efficacy             | Transformative               | 59%                      | 21%                      | 17%                      | 7%                       | 3%                            | 3%                                    | 3%                             |
| Gender, attitudes, relations, norms       | Transformative               | 72%                      | 14%                      | 10%                      | 7%                       | 0%                            | 0%                                    | 3%                             |
| Time use                                  | Transformative               | 68%                      | 12%                      | 12%                      | 8%                       | 3%                            | 3%                                    | 0%                             |
