# Supplementary material for: Systematic mapping of gender equality and social inclusion in WASH interventions: knowledge clusters and gaps
Source: PubMed Central journal article supplement — BMJ Glob Health. 2023 Jan 24;8(1):e010850. doi: 10.1136/bmjgh-2022-010850 (PMC9884933; doi:10.1136/bmjgh-2022-010850), 2023-01-24
Supplement: bmjgh-2022-010850supp025.pdf [file bmjgh-2022-010850supp025.pdf]

**Table S11: Heatmap of outcome themes distributed across intervention levels.** Greens represent (potential) evidence clusters and reds represent (potential) evidence gaps. One study can report on multiple outcomes and intervention levels

| Outcome themes                              | Inclusive or transformative? | Household (% of all studies) | Community (% of all studies) | Schools (% of all studies) | Individual (% of all studies) | Service provider (% of all studies) | Healthcare Facility (% of all studies) | Government (% of all studies) | Other (% of all studies) | Markets (% of all studies) |
|---------------------------------------------|------------------------------|------------------------------|------------------------------|----------------------------|-------------------------------|-------------------------------------|----------------------------------------|-------------------------------|--------------------------|----------------------------|
| Investments in WASH                         | Inclusive                    | 80%                          | 30%                          | 0%                         | 30%                           | 10%                                 | 10%                                    | 0%                            | 0%                       | 0%                         |
| Equitable access & use of safe sanitation   | Inclusive                    | 75%                          | 24%                          | 16%                        | 6%                            | 3%                                  | 0%                                     | 1%                            | 1%                       | 0%                         |
| Affordability                               | Inclusive                    | 72%                          | 26%                          | 8%                         | 7%                            | 8%                                  | 1%                                     | 1%                            | 1%                       | 0%                         |
| Service quality                             | Inclusive                    | 68%                          | 15%                          | 15%                        | 7%                            | 7%                                  | 1%                                     | 1%                            | 1%                       | 0%                         |
| Equitable access & use of safe water supply | Inclusive                    | 68%                          | 29%                          | 11%                        | 6%                            | 4%                                  | 2%                                     | 1%                            | 1%                       | 0%                         |
| Physical health                             | Inclusive                    | 67%                          | 37%                          | 10%                        | 3%                            | 0%                                  | 3%                                     | 0%                            | 0%                       | 0%                         |
| Attitudes towards safe WASH                 | Inclusive                    | 62%                          | 20%                          | 22%                        | 6%                            | 1%                                  | 3%                                     | 0%                            | 0%                       | 0%                         |
| Use of public spaces and services           | Inclusive                    | 60%                          | 80%                          | 0%                         | 0%                            | 0%                                  | 20%                                    | 0%                            | 0%                       | 0%                         |
| Equitable access & use of HWF               | Inclusive                    | 52%                          | 19%                          | 34%                        | 16%                           | 2%                                  | 5%                                     | 0%                            | 2%                       | 0%                         |
| Knowledge of WASH                           | Inclusive                    | 48%                          | 23%                          | 26%                        | 17%                           | 2%                                  | 5%                                     | 0%                            | 0%                       | 0%                         |
| WASH technical and managerial skills        | Inclusive                    | 31%                          | 31%                          | 6%                         | 38%                           | 19%                                 | 0%                                     | 0%                            | 0%                       | 0%                         |
| Safe MHM                                    | Inclusive                    | 14%                          | 14%                          | 61%                        | 18%                           | 0%                                  | 0%                                     | 0%                            | 0%                       | 0%                         |
| Time use                                    | Transformative               | 74%                          | 36%                          | 5%                         | 3%                            | 4%                                  | 0%                                     | 3%                            | 0%                       | 0%                         |
| Mental health & psychosocial outcomes       | Transformative               | 68%                          | 27%                          | 18%                        | 5%                            | 0%                                  | 0%                                     | 5%                            | 0%                       | 5%                         |
| Social capital                              | Transformative               | 67%                          | 67%                          | 0%                         | 0%                            | 0%                                  | 0%                                     | 0%                            | 0%                       | 0%                         |
| Mobility                                    | Transformative               | 60%                          | 20%                          | 0%                         | 20%                           | 20%                                 | 0%                                     | 0%                            | 0%                       | 0%                         |
| (Non)discrimination & equality              | Transformative               | 59%                          | 38%                          | 3%                         | 3%                            | 13%                                 | 0%                                     | 0%                            | 0%                       | 0%                         |
| Physical safety & violence                  | Transformative               | 50%                          | 36%                          | 18%                        | 9%                            | 0%                                  | 0%                                     | 0%                            | 0%                       | 0%                         |
| Economic opportunities                      | Transformative               | 48%                          | 45%                          | 10%                        | 13%                           | 13%                                 | 0%                                     | 3%                            | 0%                       | 0%                         |
| Self-confidence and -efficacy               | Transformative               | 38%                          | 45%                          | 14%                        | 28%                           | 3%                                  | 0%                                     | 0%                            | 0%                       | 0%                         |
| Empowerment & agency                        | Transformative               | 37%                          | 45%                          | 5%                         | 16%                           | 11%                                 | 0%                                     | 3%                            | 0%                       | 0%                         |
| Participation                               | Transformative               | 34%                          | 53%                          | 9%                         | 11%                           | 6%                                  | 0%                                     | 4%                            | 0%                       | 0%                         |
| GESI mainstreaming of service providers     | Transformative               | 33%                          | 0%                           | 0%                         | 67%                           | 33%                                 | 0%                                     | 0%                            | 0%                       | 0%                         |
| Gender, attitudes, relations, norms         | Transformative               | 31%                          | 45%                          | 10%                        | 17%                           | 14%                                 | 0%                                     | 0%                            | 0%                       | 0%                         |
| Education                                   | Transformative               | 27%                          | 24%                          | 59%                        | 7%                            | 0%                                  | 0%                                     | 0%                            | 0%                       | 0%                         |
