# Supplementary figures and images for: Systematic mapping of gender equality and social inclusion in WASH interventions: knowledge clusters and gaps
Source: PubMed Central journal article supplement — BMJ Glob Health. 2023 Jan 24;8(1):e010850. doi: 10.1136/bmjgh-2022-010850 (PMC9884933; doi:10.1136/bmjgh-2022-010850), 2023-01-24

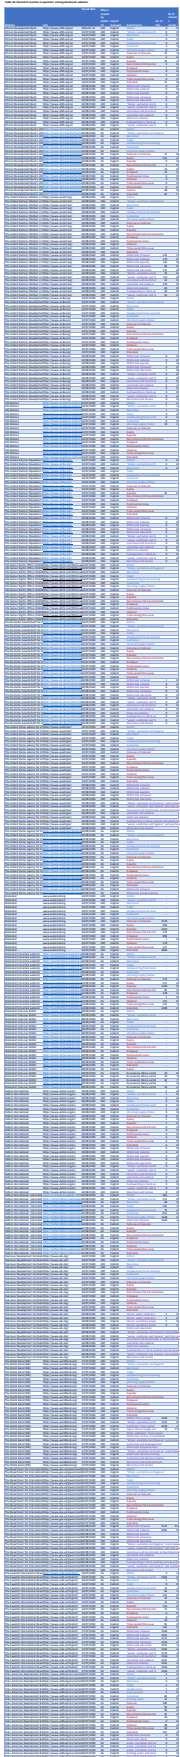

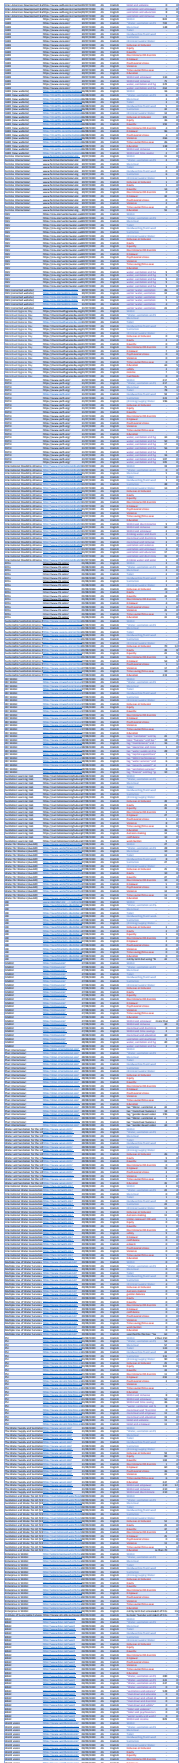

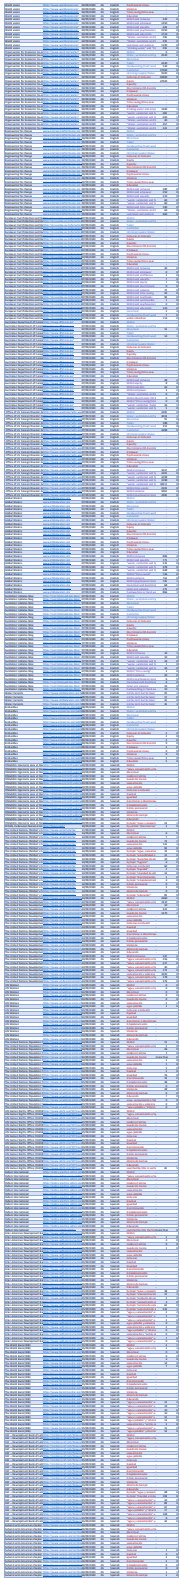

Supplement: bmjgh-2022-010850supp004.pdf [file bmjgh-2022-010850supp004.pdf]

**Figure S3: Publication year and type.** Note: searches were done in period September-November 2020.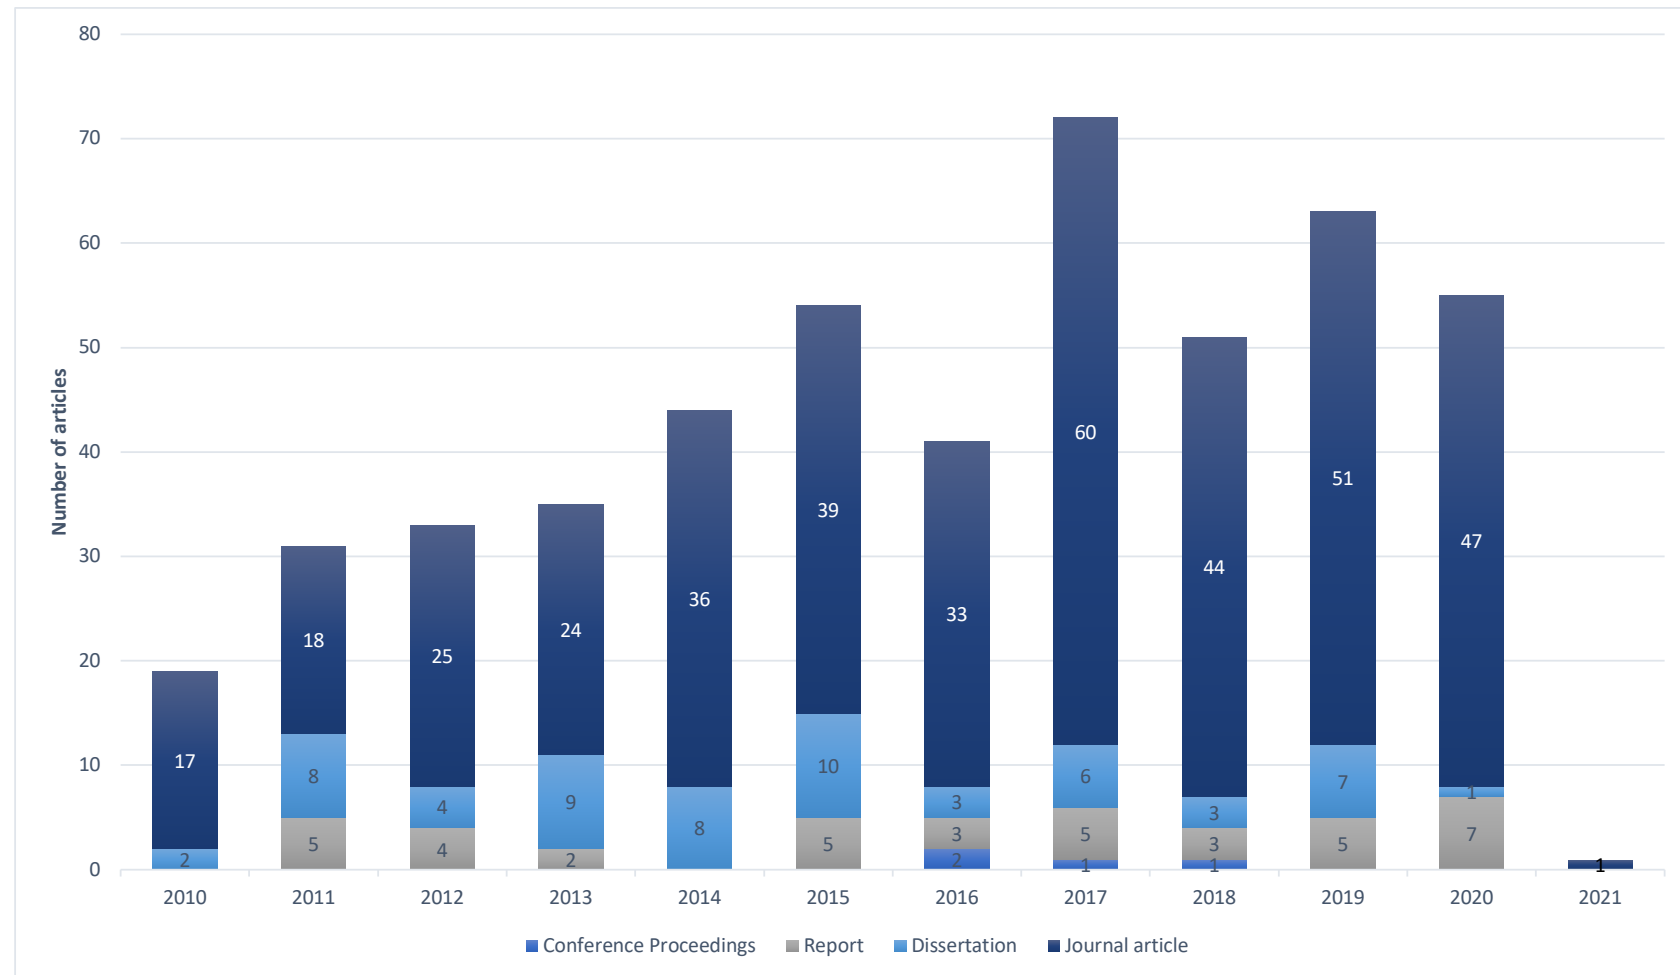

Supplement: bmjgh-2022-010850supp010.pdf [file bmjgh-2022-010850supp010.pdf]

**Figure S9: Distribution of studies across transformative and inclusive outcomes.**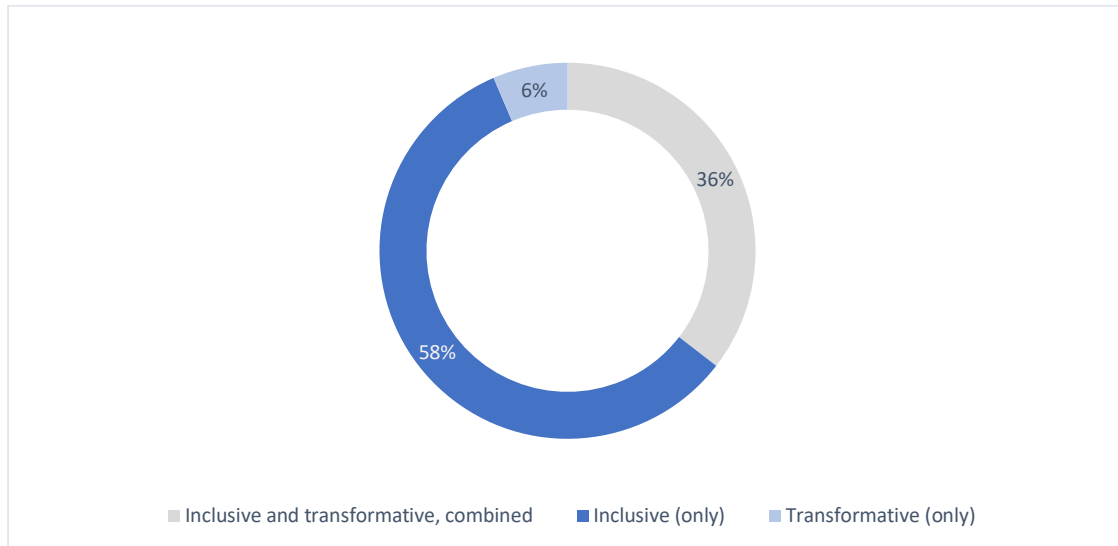

Supplement: bmjgh-2022-010850supp016.pdf [file bmjgh-2022-010850supp016.pdf]

**Figure S10: Number of reported outcomes per study across sex, age or other social categories.**

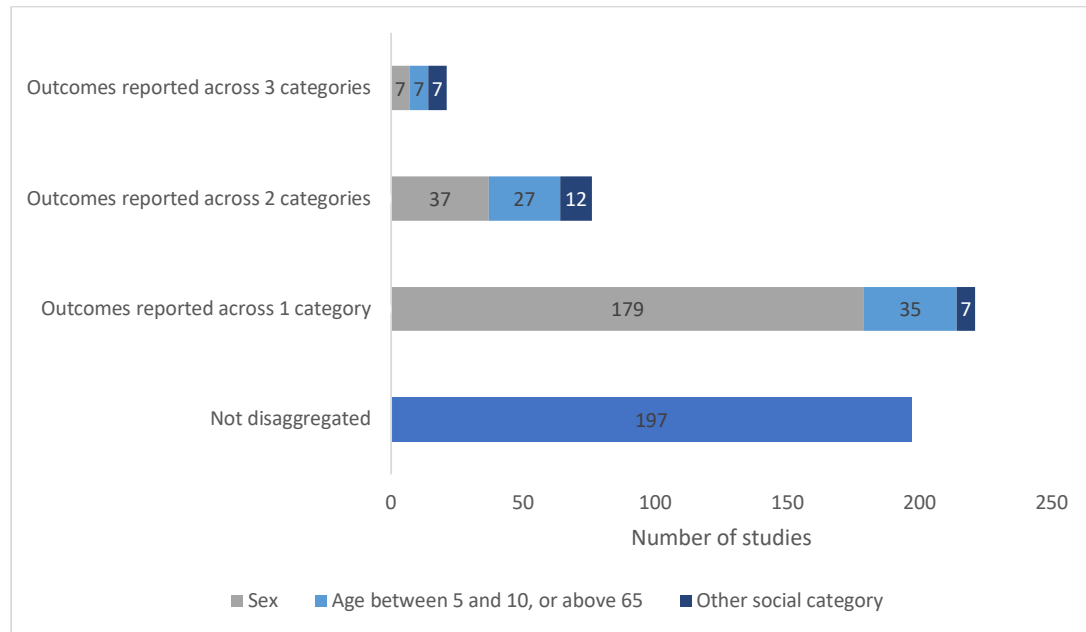

Supplement: bmjgh-2022-010850supp017.pdf [file bmjgh-2022-010850supp017.pdf]
